# Supplementary material for: Hydroesterification of styrene derivatives catalyzed by an acidic resin supporting palladium complexes
Source: Royal Society of Chemistry journal article supplement (doi:10.1039/c3cy00842h), 2014-01-01
Supplement: c3cy00842h.pdf [file c3cy00842h.pdf]

## *Supporting information*

### **Hydroesterification of styrene derivatives catalyzed by an acidic resin supporting Palladium complexes**

Zhenhong He<sup>a,b</sup>, Zhenshan Hou<sup>a,c,\*</sup>, Yanping Luo<sup>a,b</sup>, Yierxiati·Dilixiati<sup>a,b</sup> and  
Wumanjiang·Eli<sup>a</sup>

<sup>a</sup> Xinjiang Technical Institute of Physics and Chemistry, The Chinese Academy of Sciences, Urumqi 830011, People's Republic of China

<sup>b</sup> University of the Chinese Academy of Sciences, Beijing 100049, People's Republic of China

<sup>\*</sup> Key Laboratory for Advanced Materials, Research Institute of Industrial Catalysis, East China University of Science and Technology, Shanghai 200237, People's Republic of China

**Table S1.** The physical properties of supports.

| Entries | Samples          | BET surface<br>area<br>$/\text{m}^2\text{g}^{-1}$ | Mean pore diameter<br>$/\text{nm}$ | Pore volume<br>$/\text{cm}^3\text{g}^{-1}$ |
|---------|------------------|---------------------------------------------------|------------------------------------|--------------------------------------------|
| 1       | LSI-600          | 42.4                                              | 19.1                               | 0.17                                       |
| 2       | LSCA-10          | 15.5                                              | 17.1                               | 0.07                                       |
| 3       | LSCA-30          | 15.7                                              | 17.0                               | 0.11                                       |
| 4       | CT-450           | 12.8                                              | 17.2                               | 0.13                                       |
| 5       | Amberlyst 15     | 44.5                                              | 40.0                               | 0.36                                       |
| 6       | Amberlist IR 120 | 0.8                                               | -                                  | <0.001                                     |
| 7       | Silica gel       | 337.8                                             | 32.9                               | 0.91                                       |
| 8       | MCM-41           | 800                                               | 3.5                                | 0.70                                       |
| 9       | Quartz           | 1.2                                               | -                                  | <0.003                                     |

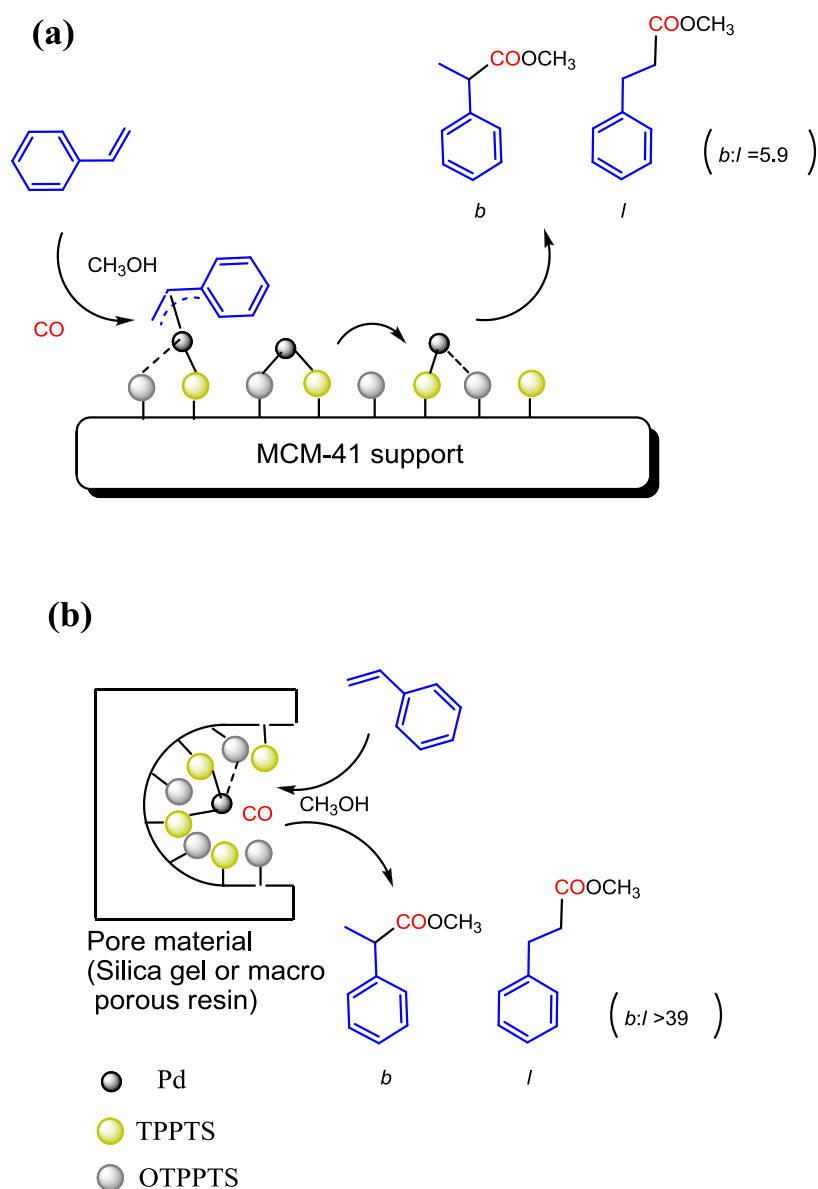

**Figure S1.** The steric confinement effect of the supports: (a) MCM-41 as the support (MCM-41 with an average pore size of 3.5 nm); (b) Silica gel and macro porous resins with an average pore size of 15-33 nm as support.

**Nitrogen adsorption isotherms of resins and the Pd-P-OP/Resin catalyst.**

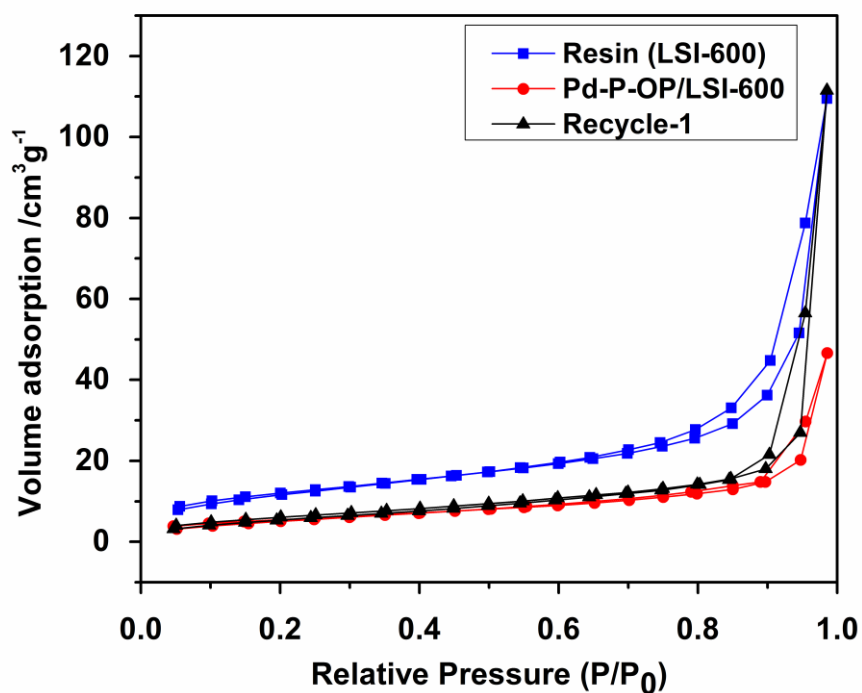

**Figure S2.** N<sub>2</sub> sorption isotherms of (■) LSI-600 resin, (●) fresh Pd-P-OP/LSI-600 catalyst and (▲) the third recycled Pd-P-OP/LSI-600 catalyst.

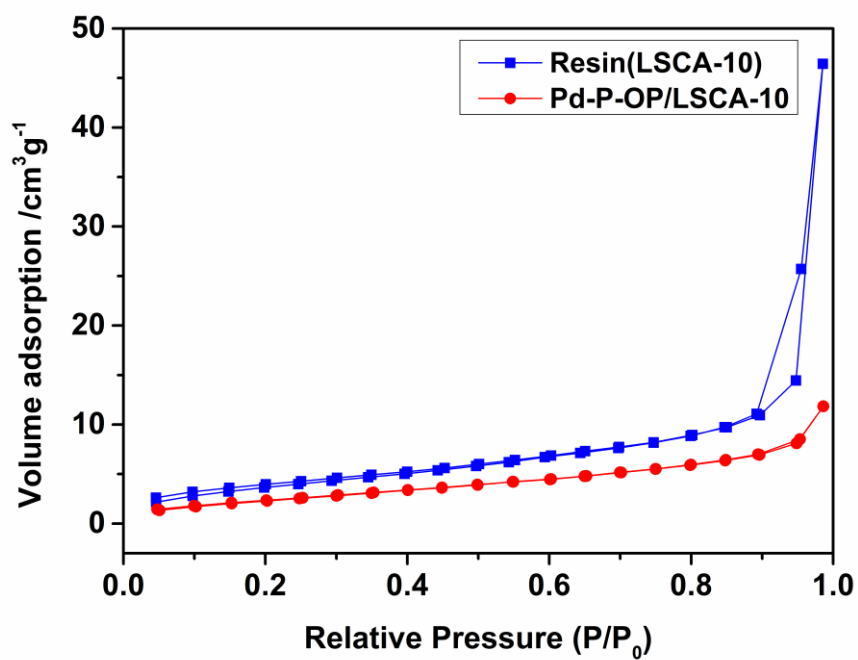

**Figure S3.** N<sub>2</sub> sorption isotherms of (■) LSCA-10 resin and (●) fresh Pd-P-OP/LSCA-10 catalyst.

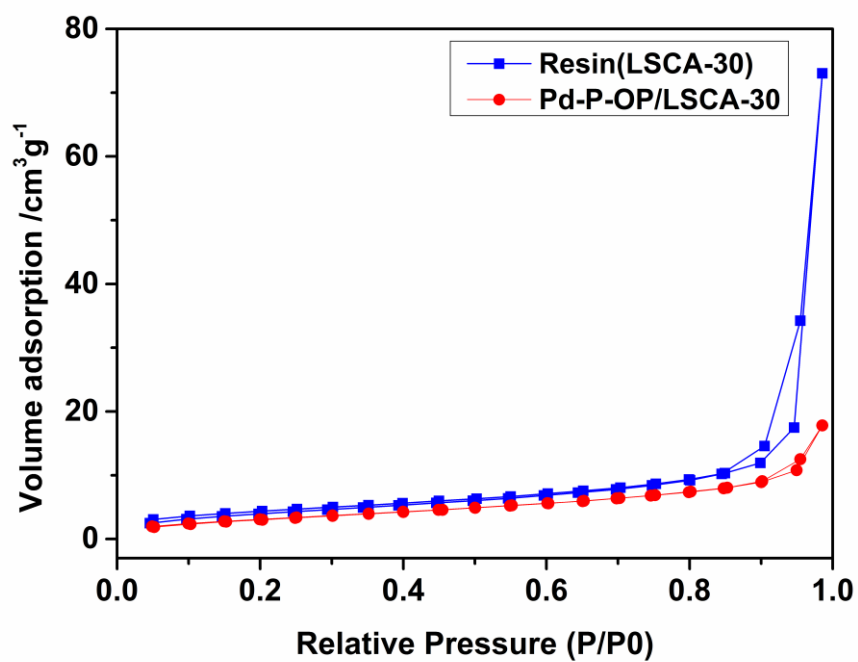

**Figure S4.** N<sub>2</sub> sorption isotherms of (■) LSCA-30 resin and (●) Pd-P-OP/LSCA-30 catalyst.

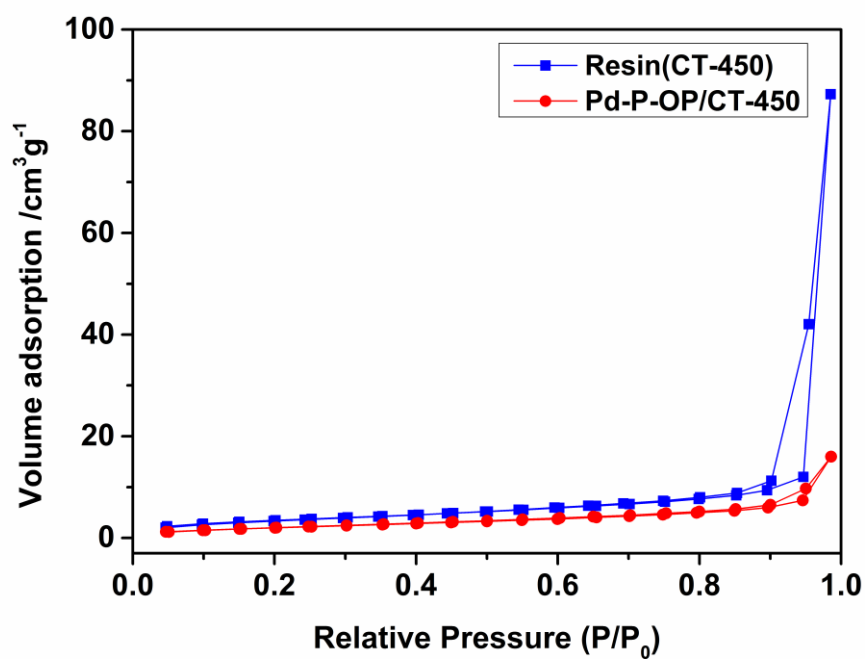

**Figure S5.** N<sub>2</sub> sorption isotherms of (■) CT-450 resin and (●) Pd-P-OP/CT-450 catalyst.

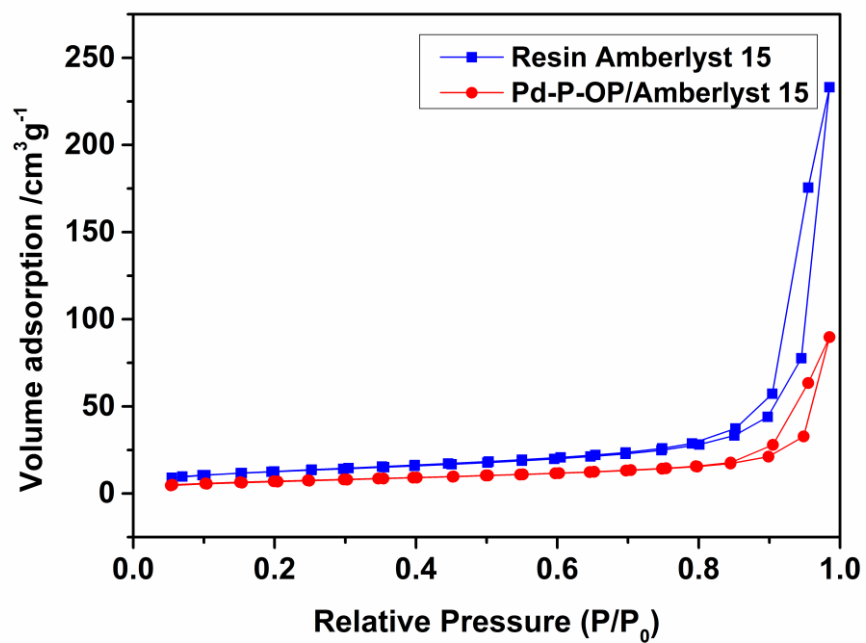

**Figure S6.** N<sub>2</sub> sorption isotherms of (■) Amberlyst 15 resin and (●) Pd-P-OP/Amberlyst 15 catalyst.

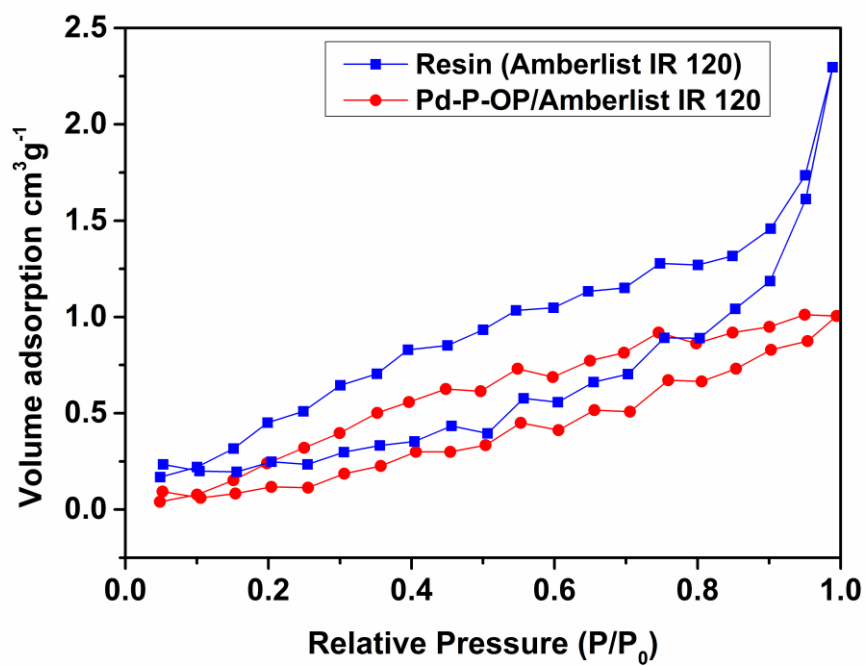

**Figure S7.**  $\text{N}_2$  sorption isotherms of (■) Amberlist IR 120 resin and (●) Pd-P-OP/Amberlist IR 120 catalyst.

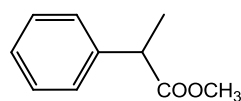

**Methyl 2-phenylpropanoate<sup>[1]</sup>:**

<sup>1</sup>H NMR (400 MHz, CDCl<sub>3</sub>) δ 7.21-7.28 (m, ArH, 5H), 3.68 (q, *J* = 7.2 Hz, CH, 1H), 3.61(s, CH<sub>3</sub>, 3H), 1.46 (d, *J* = 7.2 Hz, CH<sub>3</sub>, 3H). <sup>13</sup>C NMR (101 MHz, CDCl<sub>3</sub>) δ 175.1, 140.7, 128.8, 127.6, 127.2, 52.1, 45.5, 18.7. GC MS: MS (EI): *m/z* calcd. for [C<sub>10</sub>H<sub>12</sub>O<sub>2</sub>]:164.1, found 164.1.

<sup>1</sup>H NMR (upper) and <sup>13</sup>C NMR (bottom)

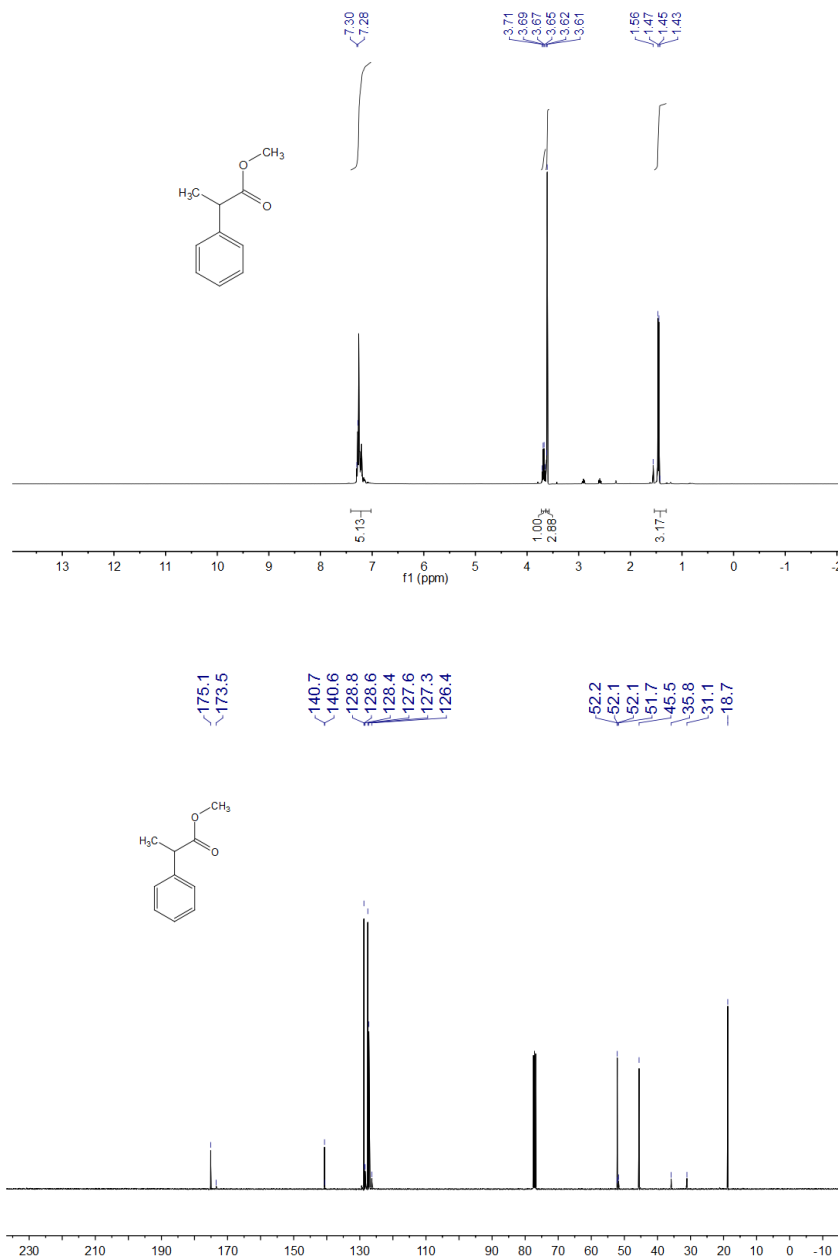

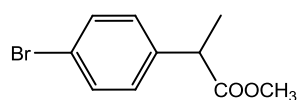

**Methyl 2-(4-bromophenyl)propanoate:**

$^1\text{H}$  NMR (400 MHz,  $\text{CDCl}_3$ )  $^1\text{H}$  NMR (400 MHz,  $\text{CDCl}_3$ )  $\delta$   
7.44 (d,  $J=8.2$ , 2H), 7.18 (d,  $J=8.2$ , 2H), 3.69 (dd,  $J=7.16$ , 1H), 3.69(s,  $\text{OCH}_3$ , 3H),  
1.48 (d,  $J=7.2$ ,  $\text{CH}_3$ , 3H).  $^{13}\text{C}$  NMR (101 MHz,  $\text{cdcl}_3$ )  $\delta$  174.6, 139.6, 131.9, 129.4,  
121.2, 52.3, 45.0, 18.6. GC MS: MS (EI):  $m/z$  calcd. for  $[\text{C}_{10}\text{H}_{11}\text{O}_2\text{Br}]$ : 242.9 found  
242.0.

$^1\text{H}$  NMR (upper) and  $^{13}\text{C}$  NMR (bottom)

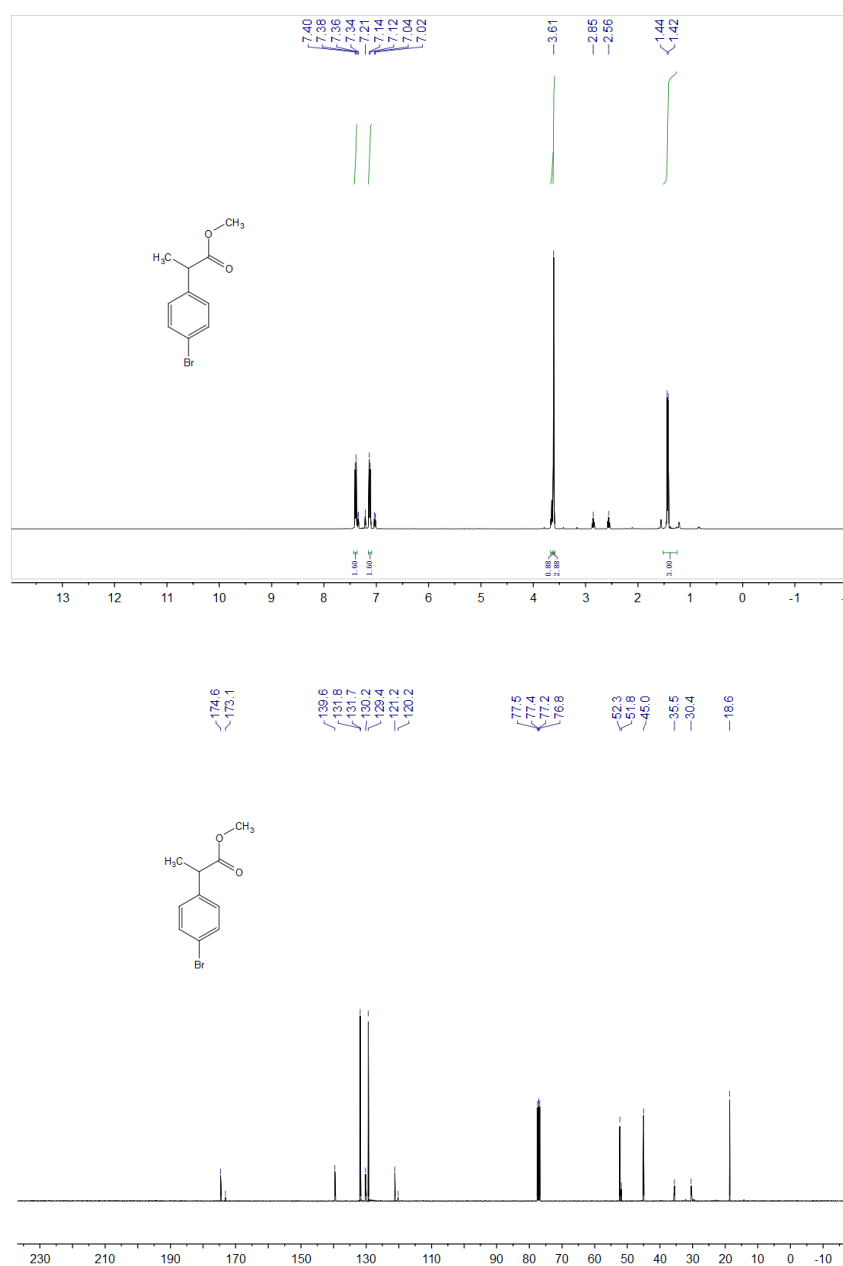

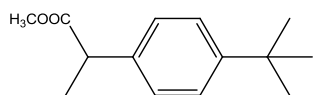

**Methyl 2-(4-*tert*-butylphenyl)propanoate:**

$^1\text{H}$  NMR (400 MHz,  $\text{CDCl}_3$ )  $\delta$  7.30 (d,  $J = 8.3$  Hz, 2H), 7.18 (d,  $J = 8.3$  Hz, 2H), 3.68 (dd,  $J = 14.3, 7.2$  Hz, 1H), 3.61 (s, 3H), 1.45 (d,  $J = 7.2$  Hz, 3H), 1.27 (s, 9H).  $^{13}\text{C}$  NMR (101 MHz,  $\text{CDCl}_3$ )  $\delta$  175.3, 150.1, 137.6, 127.2, 125.7, 52.1, 45.0, 34.6, 31.5, 18.7. GC MS: MS (EI):  $m/z$  calcd. for  $[\text{C}_{14}\text{H}_{20}\text{O}_2]$ : 220.1, found 220.2.

$^1\text{H}$  NMR (upper) and  $^{13}\text{C}$  NMR (bottom)

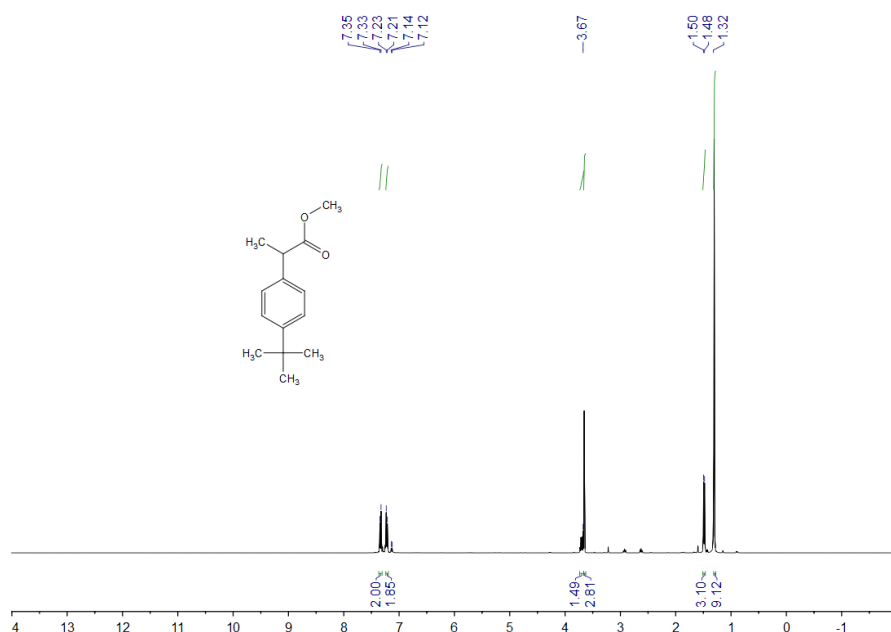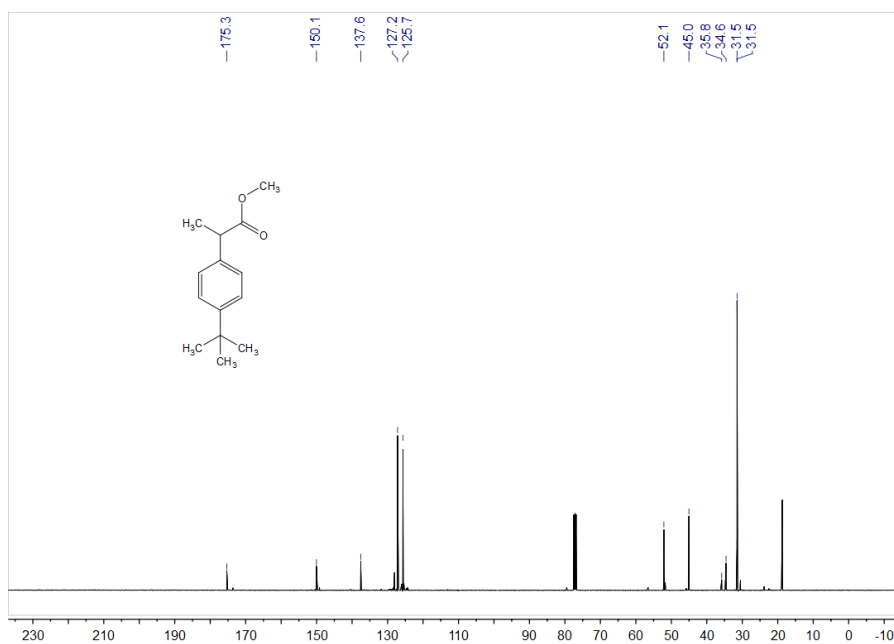

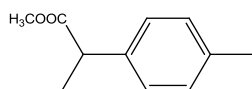

**Methyl 2-*p*-tolylpropanoate:**

$^1\text{H}$  NMR (400 MHz,  $\text{CDCl}_3$ )  $\delta$  7.15 (d,  $J = 7.9$  Hz, 2H), 7.10 (d,  $J = 7.9$  Hz, 2H), 3.66 (dd,  $J = 13.2, 6.0$  Hz, 1H), 3.61 (s, 3H), 2.29 (s, 3H), 1.45 (d,  $J = 7.2$  Hz, 3H).  $^{13}\text{C}$  NMR (101 MHz,  $\text{CDCl}_3$ )  $\delta$  175.3, 137.7, 136.9, 129.5, 127.4, 52.1, 45.1, 21.2, 18.8. GC MS: MS (EI):  $m/z$  calcd. for  $[\text{C}_{11}\text{H}_{14}\text{O}_2]$ : 178.1, found 178.1.

$^1\text{H}$  NMR (upper) and  $^{13}\text{C}$  NMR (bottom)

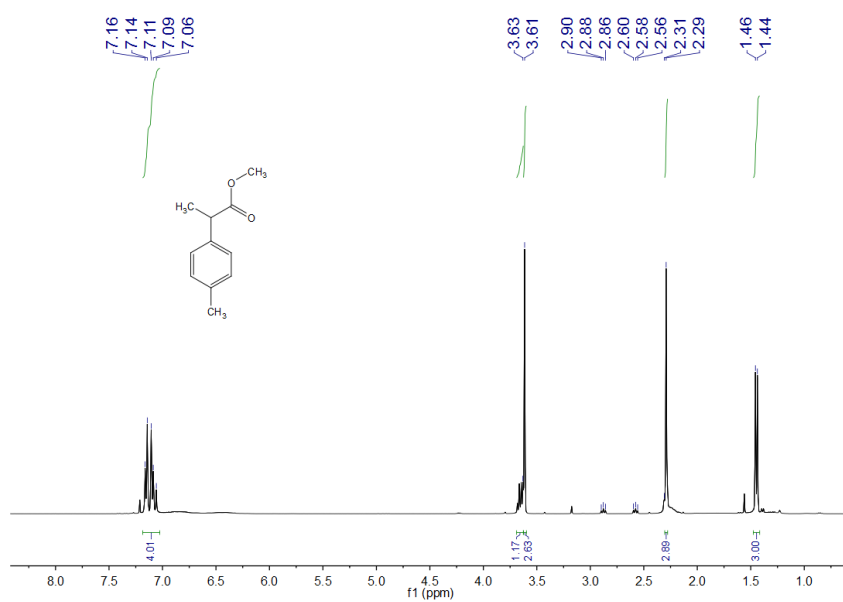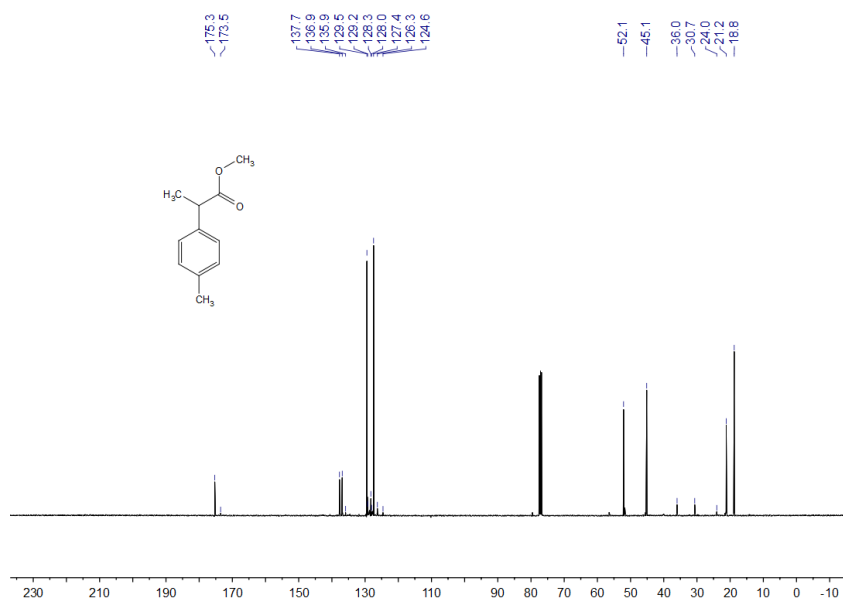

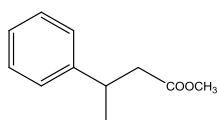

**Methyl 3-p-tolylbutanoate<sup>[1]</sup>:**

<sup>1</sup>H NMR (400 MHz, CDCl<sub>3</sub>) δ 7.25–7.10 (m, 5H), 3.54 (s, 3H), 3.21 (m, *J* = 14.5, 7.2 Hz, 1H), 2.56 (dd, *J* = 15.2, 6.8 Hz, 1H), 2.47 (dd, *J* = 15.1, 8.2 Hz, 1H), 1.23 (d, *J* = 7.0 Hz, 3H). <sup>13</sup>C NMR (101 MHz, CDCl<sub>3</sub>) δ 172.9, 145.8, 128.6, 126.8, 126.52, 51.6, 42.9, 36.6, 21.9. GC MS: MS (EI): *m/z* calcd. for [C<sub>11</sub>H<sub>14</sub>O<sub>2</sub>]:178.1, found 178.1.

<sup>1</sup>H NMR (upper) and <sup>13</sup>C NMR (bottom)

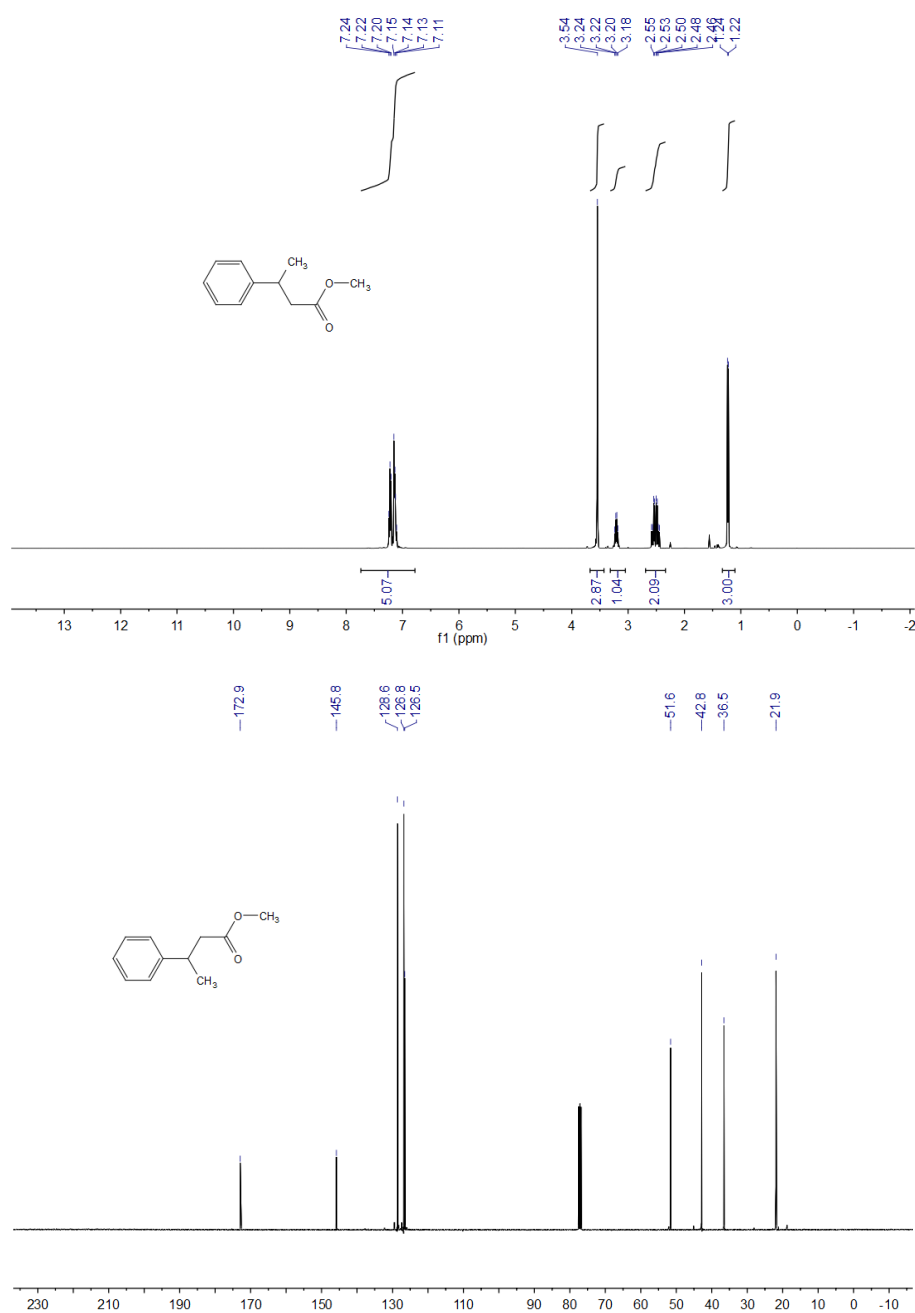

## Reference

- [1] T. M. Konrad, J. T. Durrani, C. J. Cobley, M. L. Clarke. *Chem. Commun.*, **2013**, 49, 3306.
